# Supplementary material for: Propensity Score Matching Analysis of Changes in Alpha-Fetoprotein Levels after Combined Radiotherapy and Transarterial Chemoembolization for Hepatocellular Carcinoma with Portal Vein Tumor Thrombus
Source: PLoS One. 2015 Aug 7;10(8):e0135298. doi: 10.1371/journal.pone.0135298 (PMC4529136; doi:10.1371/journal.pone.0135298)
Supplement: S1 Table — This raw data excel file shows patients characteristics (age, gender, Child-Pugh class, ECOG performance status, initial AFP level, viral etiology, tumor size, site of PVTT, and modified UICC stage), treatment outcomes (AFP response and best radiologic response), and oncologic outcomes (PFS and OS) for entire patients (n = 154). (XLS) [file pone.0135298.s001.xls]

## Sheet: entire patients
Gender	age	Child_Pugh_class	ECOG	HBV	UICC_stage	Site of PVTT	Tumor_size	Total_radiation_dose_EQD2_ab10	initial_AFP	initial_AFP_cate400	AFP_response	best_radiologic_response	best_Response_duration	PFS_status	PFS	OS_status	OS
1=male	(years)	1=A		1=HBsAg (+)	1=Stage III	1=main or bilateral	(cm)		(ng/ml)	1= ≤ 400ng/ml	1=reponse(+)	1=CR		1=no progression		1=alive
2=female		2=B		2=HBsAg (-)	2=Stage IVA	2=unilateral				2= > 400ng/ml	2=reponse(-)	2=PR		2. progression		2=died
					3=stage IVB							3=SD
												4=PD
1	35	1	1	1	2	1	10.3	60	144000	2	1	2	6.2	2	8.3	2	19.5
1	74	1	2	1	2	1	11.5	26	1070	2	1	3	8.8	2	11.7	2	15.9
1	36	1	1	1	2	1	15.5	48.8	243000	2	1	4	3.1	2	3.8	2	26.2
1	65	1	1	1	2	1	7.4	48.8	37.5	1	1	2	3.4	2	11.8	2	17.9
2	47	2	1	1	2	1	10	56	5810	2	1	2	4.5	2	8.7	2	11.4
1	61	1	1	1	2	1	10.3	56	1930	2	1	2	3.3	2	71.3	2	74.9
1	56	1	1	2	2	2	9	56	626	2	1	2	4.9	2	26.1	2	39.5
1	61	1	1	1	2	2	8.9	56	9990	2	1	2	3.8	2	15.4	2	18.3
1	73	1	1	2	2	2	7.2	56	23700	2	1	2	2.9	2	33.7	2	36.1
1	51	1	2	1	2	1	10.2	46.9	425	2	1	1	7.6	1	46.9	2	47.3
1	49	1	1	1	2	1	10.8	56	471	2	1	2	3.2	2	37.8	2	41.2
1	56	1	1	1	3	1	9.9	56	20900	2	1	3	2.8	2	9.8	2	11.7
1	45	2	1	1	2	2	11	56	231000	2	1	2	3.1	2	11.1	2	16.8
1	53	1	1	1	2	2	7.5	52	198	1	1	2	3.2	2	16.9	2	18.4
1	68	1	1	1	2	1	12.8	46.9	362	1	1	1	3.1	2	12.3	2	15.5
1	48	2	1	1	2	1	10	46.7	54400	2	1	3	3.5	2	3.5	2	12.9
1	52	1	1	1	2	2	13.5	56.3	67800	2	1	2	3.1	2	27.1	2	35.5
2	74	1	1	2	2	2	7	62.5	95.1	1	1	1	3.6	1	30.1	2	32.4
1	51	2	1	1	2	1	15	42	7270	2	1	3	2.7	1	18.5	2	19.3
1	53	2	1	2	3	2	4.2	56	75	1	1	4	3.2	2	4.1	2	7.2
1	58	1	1	1	1	2	10.5	46.7	104000	2	1	2	2.8	1	82.6	1	82.7
1	61	1	1	1	2	2	12	48.8	75.1	1	1	2	3.4	2	29.2	2	39
1	55	1	0	1	1	1	11	42.3	329	1	1	2	4.5	1	76.6	1	81.8
2	39	1	1	1	1	2	10	42.3	89430	2	1	4	1.6	2	1.6	2	5.7
1	72	1	2	1	1	2	5	39	10300	2	1	1	3.1	2	9.8	2	21.9
1	77	2	2	1	3	2	10	46.7	10500	2	1	3	2.7	1	2.7	2	11
1	47	1	1	1	2	1	11.5	39	154300	2	1	4	3.5	2	3.5	2	6.5
1	49	1	0	1	1	2	7.9	48.8	9170	2	1	1	2.7	1	13.9	2	28.4
2	55	1	1	1	1	2	8.5	35.8	35300	2	1	4	3.7	2	3.7	2	6
2	52	1	1	1	2	2	11	35.8	66600	2	1	3	3.1	2	10.2	2	14
1	55	1	1	1	1	2	8	48.8	118	1	1	2	3.4	2	19.1	2	23.3
1	39	2	1	2	1	2	6	42.3	92800	2	1	2	2.8	1	76.6	1	77.4
1	69	2	1	2	2	2	2.8	32.5	578	2	1	2	3.4	1	23.6	2	25.9
1	59	2	2	1	2	2	13	48.8	13900	2	1	4	3.6	2	4.6	2	8.8
1	46	1	0	1	2	2	7	56	7890	2	1	2	2.3	2	14.4	2	27.6
1	30	2	1	1	2	1	16	35.8	23600	2	1	3	2.8	2	5.6	2	13.1
1	48	2	1	1	2	1	13	42	13200	2	1	2	2.2	2	20.7	2	34.8
1	64	2	1	1	2	1	11	48.8	180	1	1	2	2.6	2	16.5	2	20
1	52	2	2	1	2	2	4.3	56	43.7	1	1	2	3.2	2	15.5	2	16.3
1	64	2	1	1	2	1	13	35.8	2120	2	1	4	3.3	2	3.3	2	5.8
1	37	2	2	1	2	1	21	32.5	127000	2	1	3	3	2	7.5	2	13.4
1	48	1	0	1	1	1	8	35.8	786	2	1	1	2.4	2	49.5	2	52.3
1	59	1	1	1	2	2	13	42.3	150	1	1	4	3	2	3	2	4
1	61	1	1	1	1	2	6	32.5	47100	2	1	2	3.1	2	12.1	2	20.4
1	37	1	0	1	2	2	15	41.7	260000	2	1	2	1.8	2	25	2	44.1
1	52	1	1	1	1	2	10	36.5	44.4	1	1	2	3.4	2	16.5	2	17.9
2	79	2	2	1	2	2	8	31.3	37000	2	1	4	2.9	2	3.7	2	5.1
1	69	2	2	1	2	1	16	39	13200	2	1	2	1.8	1	2.9	2	3.3
1	53	2	1	1	3	1	14	42.3	3270	2	1	4	1.4	2	3	2	4.3
1	40	1	1	1	2	2	16	39	62.4	1	1	3	2.4	2	6.3	2	11.1
1	61	2	0	1	2	2	6	35.8	150	1	1	3	1.4	2	14.2	2	25.2
1	55	1	0	1	2	2	7	48.8	32400	2	1	2	3.1	2	65.8	1	69.9
1	65	1	1	1	3	2	10	32.5	7140	2	1	3	3.1	2	4.7	2	10.4
1	46	2	1	2	2	1	20	46.9	53.9	1	1	3	2.7	2	9.7	2	10.3
1	47	1	1	1	2	2	10	48.8	15300	2	1	4	2.9	2	2.9	2	4.1
1	74	1	1	1	2	1	6	41.7	968	2	1	2	3.9	2	23.9	1	69.4
1	52	2	1	1	2	1	10	36.5	671	2	1	3	2.7	2	4.9	2	6.8
1	63	1	0	2	1	2	3	48.8	230	1	1	2	4.2	1	66.9	1	69.1
1	53	2	1	1	2	1	11	36.5	21000	2	1	4	2.7	2	2.8	2	7.5
1	58	2	1	1	2	1	12	36.5	32100	2	1	3	2.2	2	5.2	2	7.5
1	30	1	0	1	1	2	8	48.8	76.7	1	1	2	3.3	2	41.9	1	68.6
2	52	2	1	1	2	2	9	35.8	7720	2	1	3	2.2	2	7	2	8.2
1	35	1	1	1	2	2	6	45.5	286	1	1	4	1.5	2	3	2	11.1
2	33	1	1	1	2	2	10	41.7	296000	2	1	2	4.2	2	11.4	2	22.8
2	50	2	1	1	3	2	14	39	19100	2	1	4	1.9	2	2.9	2	5.7
1	52	2	1	1	2	1	13	48.8	335	1	1	3	2.7	2	5	2	7.8
1	56	1	0	1	1	2	2.5	55.3	890	2	1	1	6.3	1	65.4	1	66.4
1	52	1	0	1	2	1	11	39	191	1	1	2	3	2	15.1	2	18.1
1	50	2	1	1	2	2	11	39	73500	2	1	2	2.5	2	11.4	2	30.7
1	62	1	1	1	2	2	3	41.7	110	1	1	4	2.5	2	3.7	2	8.1
1	53	1	1	1	2	1	10.5	41.7	7030	2	1	4	2.3	2	3.6	2	6.8
1	70	1	0	2	2	2	4.5	55.3	365	1	1	4	2.8	2	2.8	2	5.9
1	40	1	1	1	2	2	11	39	123000	2	1	4	2.1	2	4.4	2	7.4
2	53	1	1	1	2	1	10	35.8	119000	2	1	4	2.3	2	3.2	2	15.4
2	59	1	1	1	2	2	6	39	233	1	1	2	3.2	1	61.9	1	65
1	64	1	1	2	2	1	13	32.5	603000	2	1	4	3.3	2	3.3	2	3.8
1	54	1	0	1	2	1	7.8	41.7	67.1	1	1	3	2.6	1	3.5	2	9.3
2	43	2	2	1	2	1	12	35.8	69.3	1	1	3	2.3	2	4.9	2	6.5
1	46	1	1	2	2	2	7.7	56	68.5	1	1	1	3.3	1	58.7	1	63.5
1	56	1	1	1	2	2	7	41.7	76100	2	1	3	2.2	2	3.6	2	30.5
1	53	1	1	2	2	1	16	39.1	218000	2	1	4	2.9	2	2.9	2	25.1
1	70	2	1	2	2	2	14	35.8	20000	2	1	3	2.5	2	5.5	2	9.7
2	53	2	0	2	2	1	12	48.8	433000	2	1	3	1.9	1	4.1	2	5.4
1	37	1	0	1	2	1	10.5	36.5	7470	2	1	2	2.4	2	9.6	2	9.8
1	32	1	1	1	3	2	7	44	346	1	1	4	2.2	2	3.6	2	5.9
1	63	1	1	1	2	2	10	48.8	4630	2	1	2	2.1	2	12.6	2	19.6
1	68	1	1	1	2	1	12	48.8	10500	2	1	2	4.4	2	15.5	2	16.7
1	44	2	1	1	3	2	9	35.8	83200	2	1	4	1.8	2	5.4	2	7.7
1	54	2	2	1	2	1	9	35.8	142	1	1	3	4.9	1	7	2	13.2
1	38	1	1	1	2	1	13.5	41.7	40100	2	1	2	3.3	2	10.5	2	18.7
1	42	2	1	1	2	1	15	41.7	66.4	1	1	2	2.5	2	20.3	2	21
1	64	1	0	1	2	2	10.5	48.8	1880	2	1	2	2.3	2	13.9	2	18.8
1	43	1	1	1	2	1	15	39	23400	2	1	2	4.2	2	12.5	2	14.1
1	48	2	1	1	2	1	12.5	35.8	44300	2	1	3	2.7	1	12.6	2	14.3
1	42	1	1	1	2	1	14.5	36.5	799000	2	1	3	1.4	2	9.2	2	11.1
1	61	1	1	1	2	1	14	44.3	42.2	1	1	3	2.3	1	7.1	2	11.2
1	61	1	0	1	2	2	12	48.8	235	1	1	3	2.1	2	5.8	2	7.4
1	50	2	1	1	2	1	14	36.5	333	1	1	2	3	2	7.4	2	15.3
1	49	1	0	1	1	2	3.6	48.8	301	1	1	2	2.9	2	10.5	2	14.3
1	56	1	1	1	2	1	8.6	52.1	370	1	2	4	3.7	2	8.1	2	11.1
1	49	1	1	2	2	1	8.2	56	214	1	2	2	4.1	2	10.6	2	13.8
1	50	2	1	1	2	1	7.5	41.7	22.4	1	2	4	2.5	2	3	2	5
1	44	2	1	1	2	2	12.9	46.7	21.1	1	2	4	2.7	2	2.7	2	4.9
1	55	2	1	1	2	1	13	41.7	4470	2	2	4	2.3	2	2.3	2	3.9
1	38	2	1	1	2	1	13.8	46.9	37.5	1	2	3	2.6	2	3.5	2	4.5
1	45	1	1	1	3	1	16.1	56	1170	2	2	4	5.2	2	5.2	2	5.8
1	48	1	1	1	2	1	7.1	48.8	293	1	2	4	2.8	2	4.6	2	5.6
1	44	2	1	1	1	1	11.7	37.3	72.8	1	2	2	2.9	2	8.2	2	16
1	36	2	1	1	2	1	15.3	46.7	6280	2	2	4	1.8	2	3.2	2	3.7
1	41	2	2	1	3	1	13.5	46.7	69.1	1	2	3	2.1	2	3.3	2	4.5
1	59	2	1	1	2	1	10.5	37.3	673	2	2	3	2.2	2	6.3	2	8.8
2	58	2	1	1	2	1	6	37.3	7840	2	2	4	3	2	3	2	10.6
2	46	2	1	1	2	1	9	41.7	2720	2	2	4	3.3	2	4.5	2	6
1	44	2	0	1	2	2	16	62.5	456000	2	2	4	3.6	2	3.6	2	4.4
1	45	1	1	1	2	2	12.5	62.5	88200	2	2	4	2.7	2	3.6	2	4.3
1	68	1	1	1	1	2	3	37.3	1790	2	2	4	3.4	2	3.4	2	5.9
1	48	1	0	1	2	1	15	31.3	2840	2	2	4	3	2	3	2	5.5
1	46	1	1	1	1	2	10	48.8	445	2	2	4	2.5	2	2.5	2	4.8
1	44	1	0	1	1	2	8	36.5	65400	2	2	4	4.2	2	4.2	2	6.7
2	64	1	1	1	2	2	5	35.8	12400	2	2	4	3.8	2	5.2	2	5.9
1	52	2	1	1	2	2	5.2	39	2480	2	2	4	3.8	2	8.8	2	10.7
1	53	2	1	1	2	2	12	48.8	4210	2	2	4	2.8	2	2.8	2	4.1
1	48	2	1	1	2	1	15	35.8	4720	2	2	4	1.5	2	2.7	2	5.4
1	48	1	0	1	2	1	12	48.8	45.9	1	2	2	2.9	2	28.5	2	32.8
1	45	2	1	1	2	2	13	35.8	4580	2	2	3	3.7	2	5.9	2	7.6
2	53	1	1	1	2	2	8.5	48.8	61400	2	2	4	2.3	2	2.3	2	6.1
1	58	2	2	1	2	1	16	35.8	850	2	2	4	1.8	2	3	2	5
2	63	2	0	1	2	2	12	45.5	153	1	2	2	2.6	2	8.4	2	28.1
1	65	2	1	2	2	2	9	48.8	1310	2	2	4	3.6	2	3.6	2	5.3
1	50	1	2	1	3	2	8.5	35.8	2900	2	2	4	2.4	2	2.4	2	6.3
2	59	2	1	1	2	1	8	32.5	563	2	2	4	2.5	2	2.5	2	3.1
2	40	2	1	1	2	1	12	39	11000	2	2	4	2.3	2	4.9	2	6.2
1	68	1	2	1	2	2	8.5	32.5	1610	2	2	4	3.1	2	7.5	2	8.5
1	64	1	1	1	2	1	15.5	46.9	299	1	2	3	2.7	2	13.6	2	15.2
1	44	1	1	1	2	1	12	45.5	25400	2	2	4	2.9	2	2.9	2	5.2
1	44	2	1	1	2	1	12	41.7	22	1	2	4	2.6	2	4.6	2	26.2
1	43	2	0	1	2	1	13.5	32.5	2020	2	2	3	2.3	2	8.2	2	9.3
2	65	2	1	1	2	2	15	35.8	25.6	1	2	4	2.1	2	2.1	2	9.1
1	45	2	2	1	2	1	15	35.8	3020	2	2	4	2.9	2	2.9	2	3.9
1	64	2	0	1	1	2	4.8	48.8	29.6	1	2	2	3.4	1	9.2	2	10.6
1	44	2	2	1	3	1	17	42.3	49	1	2	4	1.6	2	4.3	2	4.9
1	43	2	2	1	3	2	16.5	39	1740	2	2	4	2	2	2	2	3.2
1	48	1	0	1	2	1	10.5	35.8	32500	2	2	4	1.7	2	1.7	2	5.3
1	37	1	1	1	2	1	12.5	36.5	33.4	1	2	4	2.4	2	6.6	2	11.9
1	39	1	1	1	2	2	10	45.5	33900	2	2	4	3.2	2	3.2	2	4.5
1	73	1	0	1	3	1	12	39.1	25	1	2	4	2.1	2	2.1	2	13
1	36	2	2	1	2	1	10	32.5	37400	2	2	3	1.6	2	3.6	2	5.5
1	37	2	1	1	3	1	13	39.1	51200	2	2	4	2.2	2	2.2	2	6.1
1	57	2	1	1	2	1	17.5	36.5	30.8	1	2	2	1.9	1	19.5	2	21.2
2	47	1	1	1	2	1	17.5	42.3	529000	2	2	3	2.2	2	2.3	2	4
1	50	1	0	1	2	2	11.5	41.7	204	1	2	3	2.4	2	15.9	2	30.4
1	51	1	0	1	3	1	18	31.3	15600	2	2	3	2.3	2	3.5	2	4.1
1	58	1	1	1	2	2	8.5	48.8	119000	2	2	4	2.6	2	2.6	2	3.6
1	45	2	1	1	2	1	15	31.3	1250	2	2	4	2.6	2	2.6	2	3.2
